# Supplementary material for: Facile and rapid fabrication of metal–organic framework nanobelts and color-tunable photoluminescence properties
Source: Royal Society of Chemistry journal article supplement (doi:10.1039/b927465k), 2010-01-01
Supplement: b927465k.pdf [file b927465k.pdf]

## Supporting Information

### **Facile and rapid fabrication of metal-organic framework nanobelts and color-tunable photoluminescence properties**

**Kai Liu,<sup>a,b</sup> Hongpeng You\*,<sup>a</sup> Yuhua Zheng,<sup>a,b</sup> Guang Jia,<sup>a,b</sup> Yanhua Song,<sup>a,b</sup> Yeju Huang,<sup>a,b</sup> Mei Yang,<sup>a,b</sup> Junjiao Jia,<sup>a</sup> Ning Guo<sup>a,b</sup> and Hongjie Zhang\*<sup>a</sup>**

*<sup>a</sup>State Key Laboratory of Rare Earth Resource Utilization, Changchun Institute of Applied Chemistry, Chinese Academy of Sciences, Changchun 130022, P. R. China.*

*E-mail: hpyou@ciac.jl.cn or hongjie@ciac.jl.cn*

*<sup>b</sup>Graduate School of the Chinese Academy of Sciences, Beijing 100049, P. R. China.*

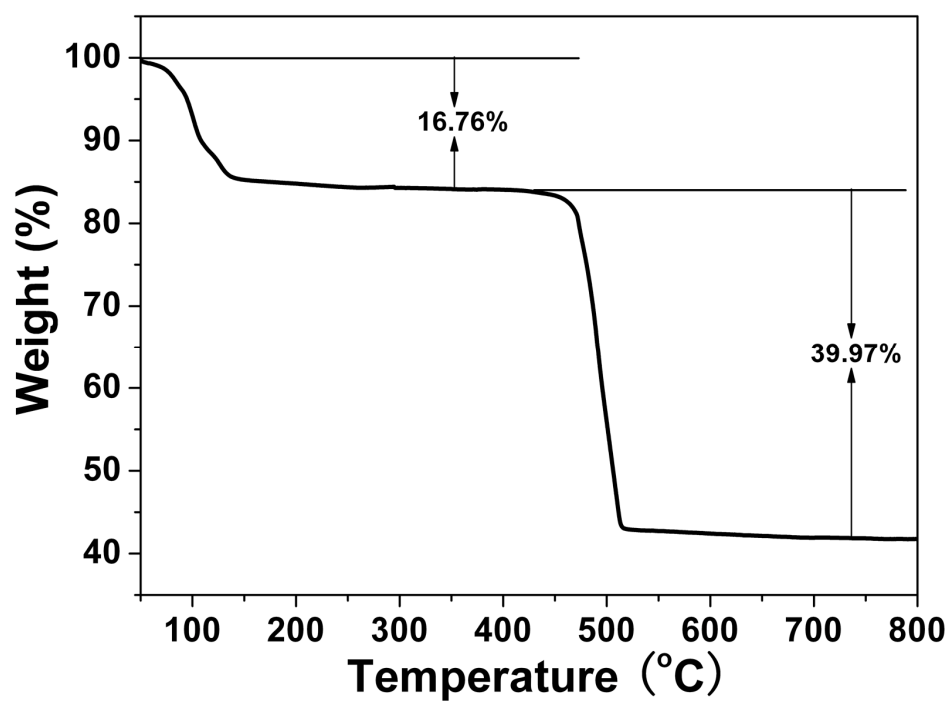

**Figure S1.** TGA curve of the as-obtained Tb(1,3,5-BTC)(H<sub>2</sub>O)·3H<sub>2</sub>O nanobelts.

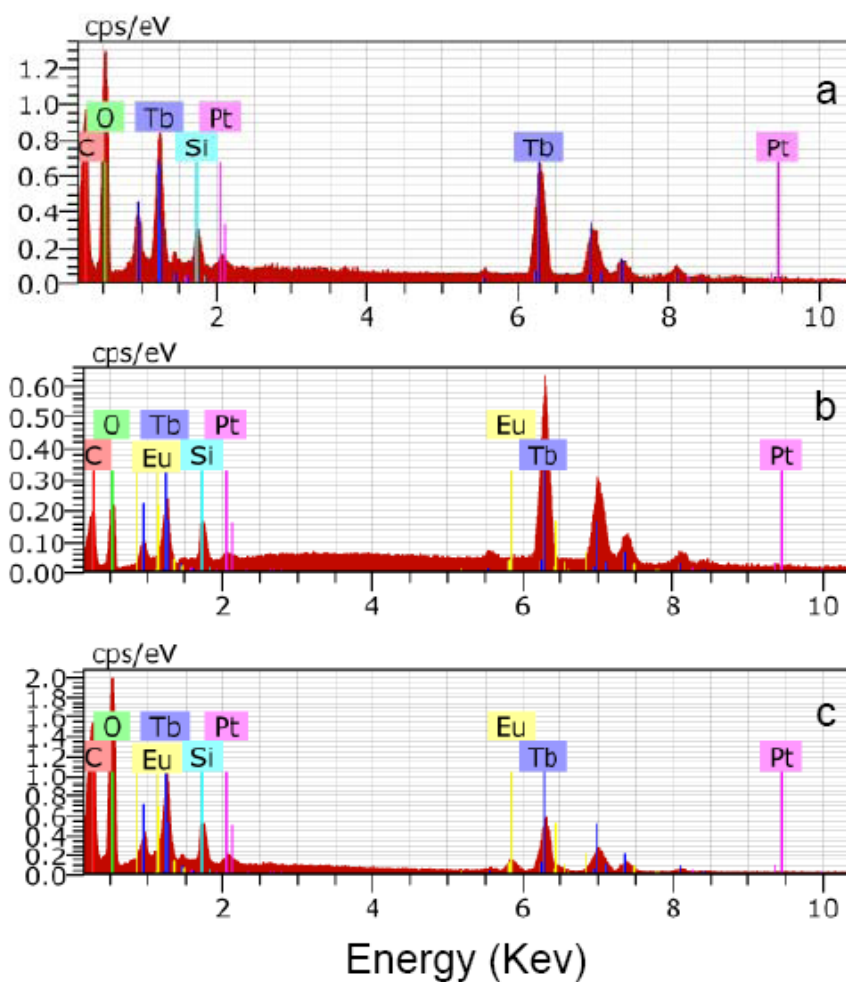

**Figure S2.** EDS spectra of the as-obtained Tb(1,3,5-BTC)(H<sub>2</sub>O)·3H<sub>2</sub>O (a), Tb(1,3,5-BTC)(H<sub>2</sub>O)·3H<sub>2</sub>O:0.5%Eu<sup>3+</sup> (b), and Tb(1,3,5-BTC)(H<sub>2</sub>O)·3H<sub>2</sub>O:5%Eu<sup>3+</sup> (c) nanobelts.

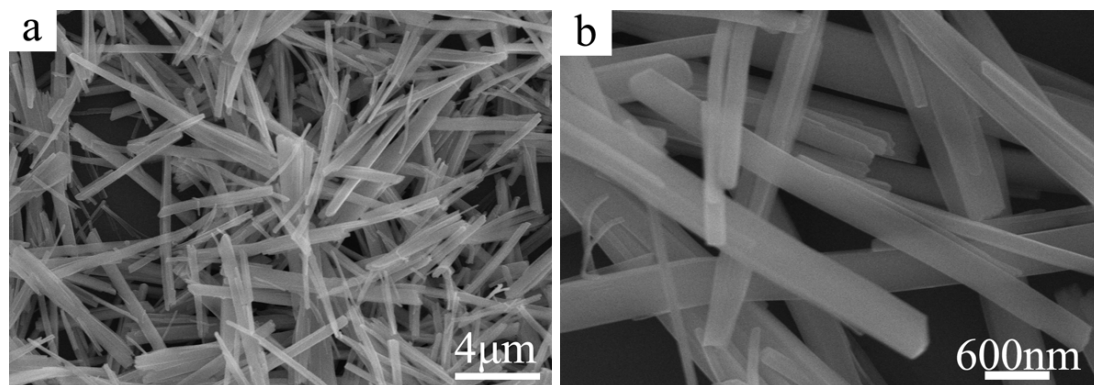

**Figure S3.** SEM images at different magnifications of the Tb(1,3,5-BTC)(H<sub>2</sub>O)·3H<sub>2</sub>O using ethanol as the single solvent (40 mL, 2:2 mmol, R.T.).

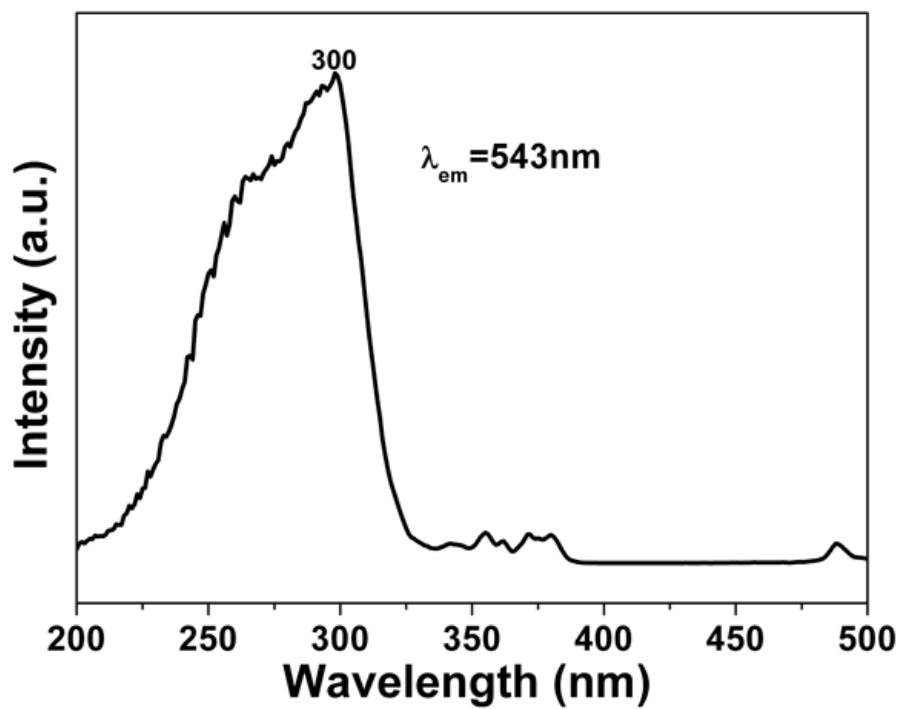

**Figure S4.** Excitation spectrum of the Tb(1,3,5-BTC)(H<sub>2</sub>O)·3H<sub>2</sub>O nanobelts.

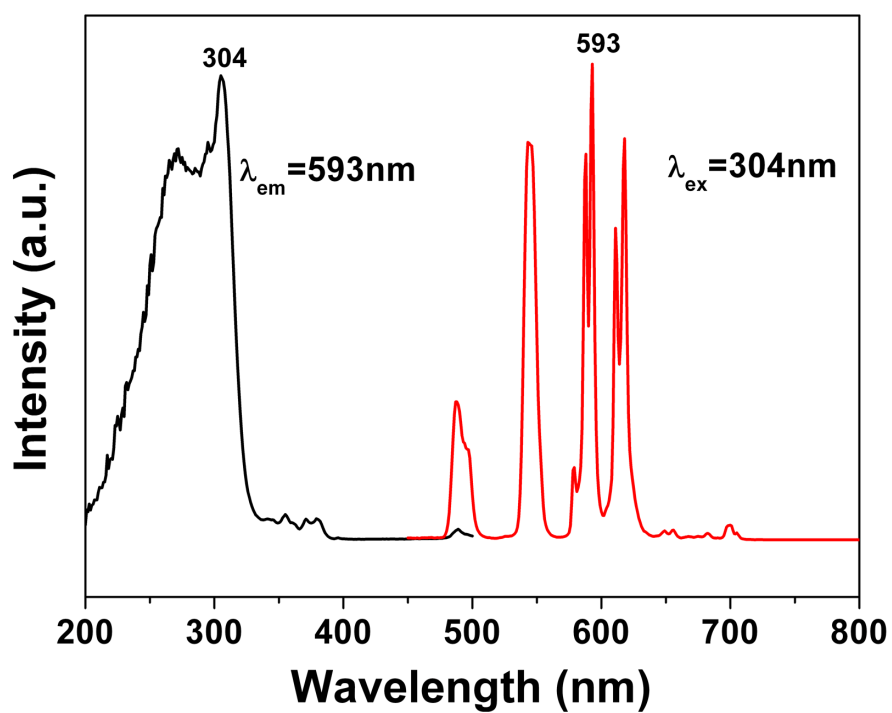

**Figure S5.** Excitation and emission spectra of the Tb(1,3,5-BTC)(H<sub>2</sub>O)·3H<sub>2</sub>O:0.5%Eu<sup>3+</sup> nanobelts.

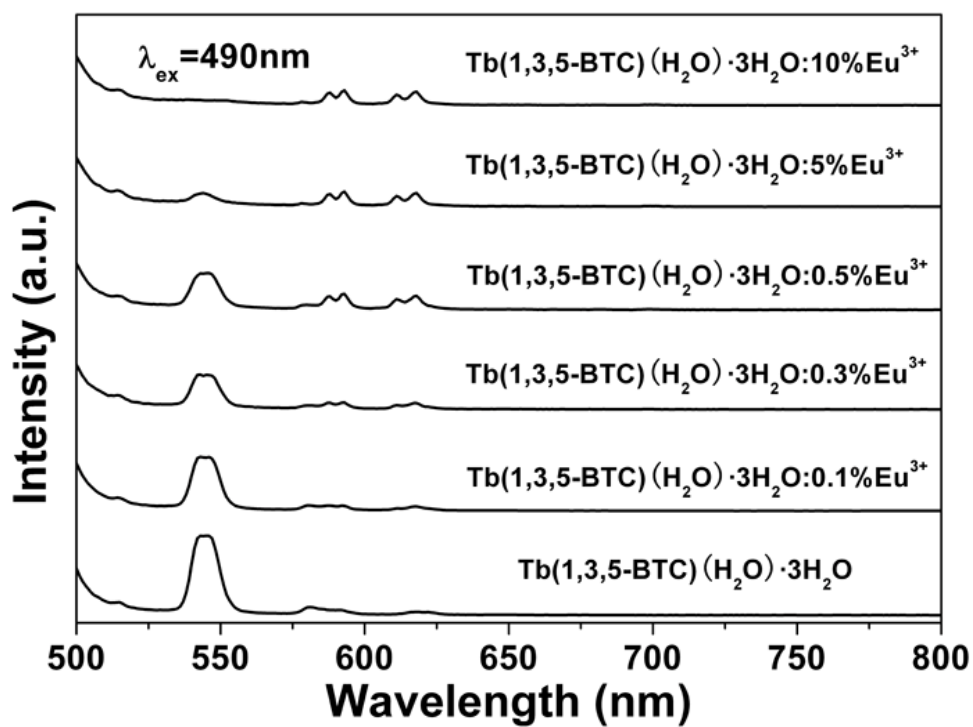

**Figure S6.** Emission spectra of the Tb(1,3,5-BTC)(H<sub>2</sub>O)·3H<sub>2</sub>O:*x*Eu<sup>3+</sup> (*x* = 0–10 mol%) nanobelts under 490 nm excitation.

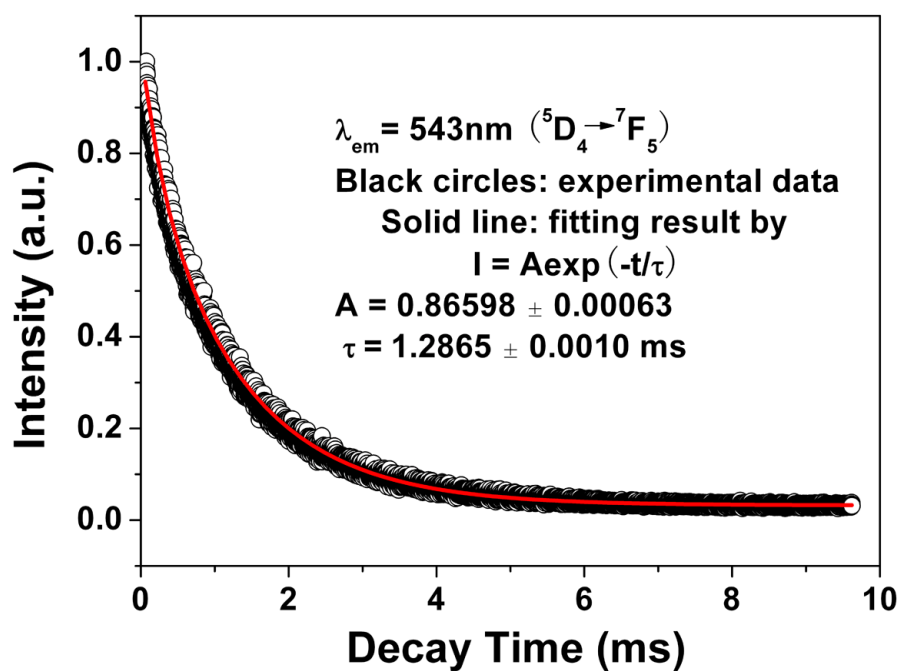

**Figure S7.** The luminescence decay curve for the Tb(1,3,5-BTC)(H<sub>2</sub>O)·3H<sub>2</sub>O nanobelts.



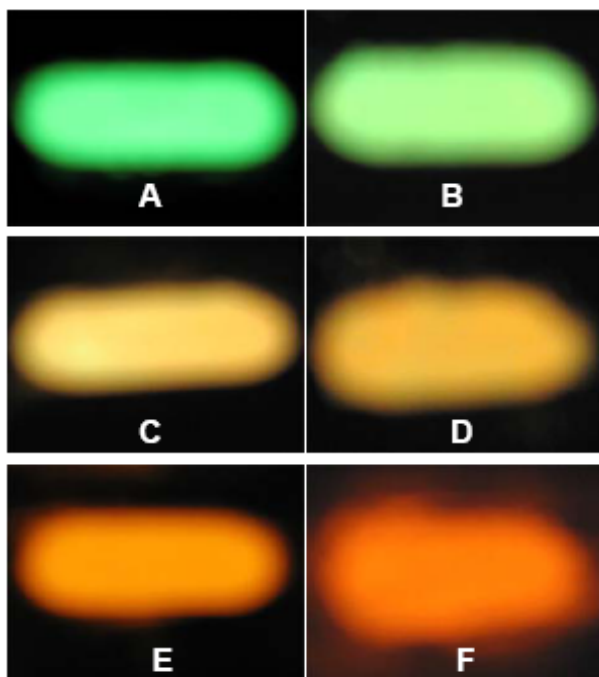

**Figure S8.** The photographs for the luminescent  $\text{Tb}(1,3,5\text{-BTC})(\text{H}_2\text{O})\cdot 3\text{H}_2\text{O}:x\text{Eu}^{3+}$  ( $x = 0$  for A, 0.1% for B, 0.3% for C, 0.5% for D, 5% for E, and 10% for F,) nanobelts.

Here, a 254 nm ultraviolet lamp was used as an excitation source.
